# Supplementary material for: Necrostatin-1 Attenuates Renal Ischemia and Reperfusion Injury via Meditation of HIF-1α/mir-26a/TRPC6/PARP1 Signaling
Source: PubMed Central journal article supplement (PMC6706591; doi:10.1016/j.omtn.2019.06.025), 2019-07-12
Supplement: mmc1.pdf [file mmc1.pdf]

OMTN, Volume 17

## Supplemental Information

### **Necrostatin-1 Attenuates Renal Ischemia and Reperfusion Injury via Meditation of HIF-1 $\alpha$ /mir-26a/TRPC6/PARP1 Signaling**

**Bingbing Shen, Mei Mei, Youmin Pu, Huhai Zhang, Hong Liu, Maozhi Tang, Qianguang Pan, Yue He, Xiongfei Wu, and Hongwen Zhao**

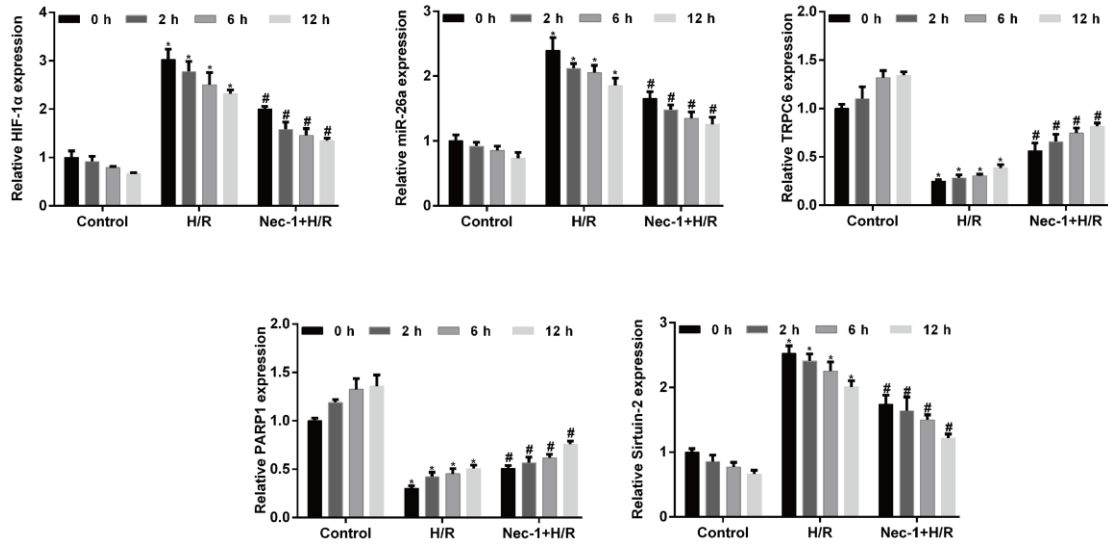

**Figure 1S.** The levels of HIF-1 $\alpha$ , miR-26a, TRPC6, necroptosis, oxidative stress, and inflammation-related molecules in HK-2 cells under conditions of H/R injury with or without Nec-1 treatment. Quantitative real-time PCR was used to determine the relative levels of HIF-1 $\alpha$ , miR-26a, TRPC6, PARP1, and Sirtuin-2 in HK-2 cells. \* $p < 0.05$  vs. control group; # $p < 0.05$  vs. the H/R injury group.

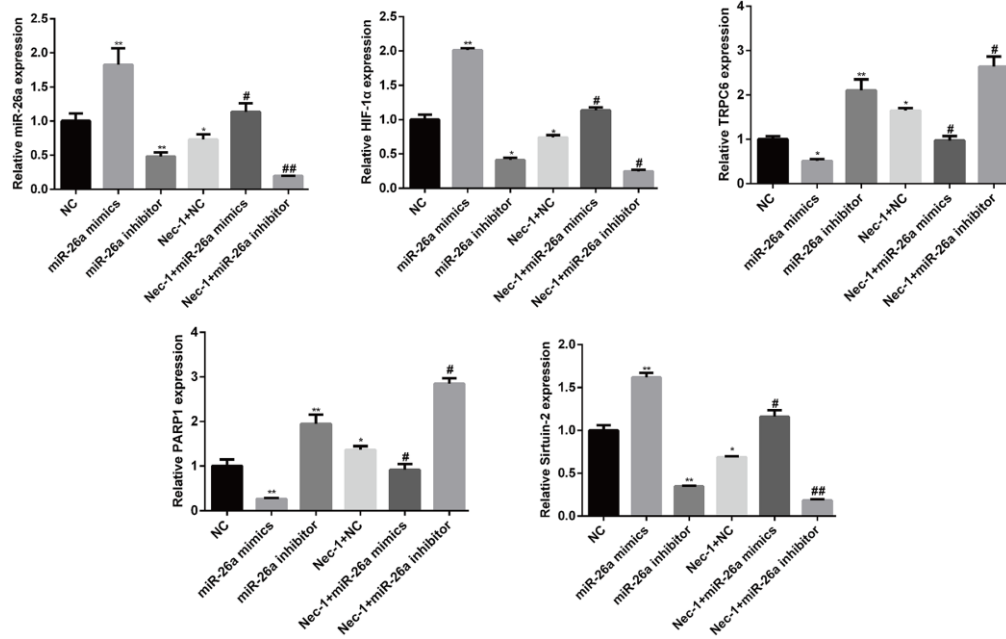

**Figure 2S. Effects of downregulation or upregulation of miR-26a on the levels of HIF-1 $\alpha$ , miR-26a, TRPC6, necroptosis, oxidative stress, and inflammation-related molecules in HK-2 cells under conditions of H/R injury with or without Nec-1 treatment.** Quantitative real-time PCR was used to determine the relative levels of miR-26a, HIF-1 $\alpha$ , TRPC6, PARP1, and Sirtuin-2 in HK-2 cells. \* $p < 0.05$ , \*\* $p < 0.01$  vs. the NC group; # $p < 0.05$ , ## $p < 0.01$  vs. the Nec-1 + H/R group.

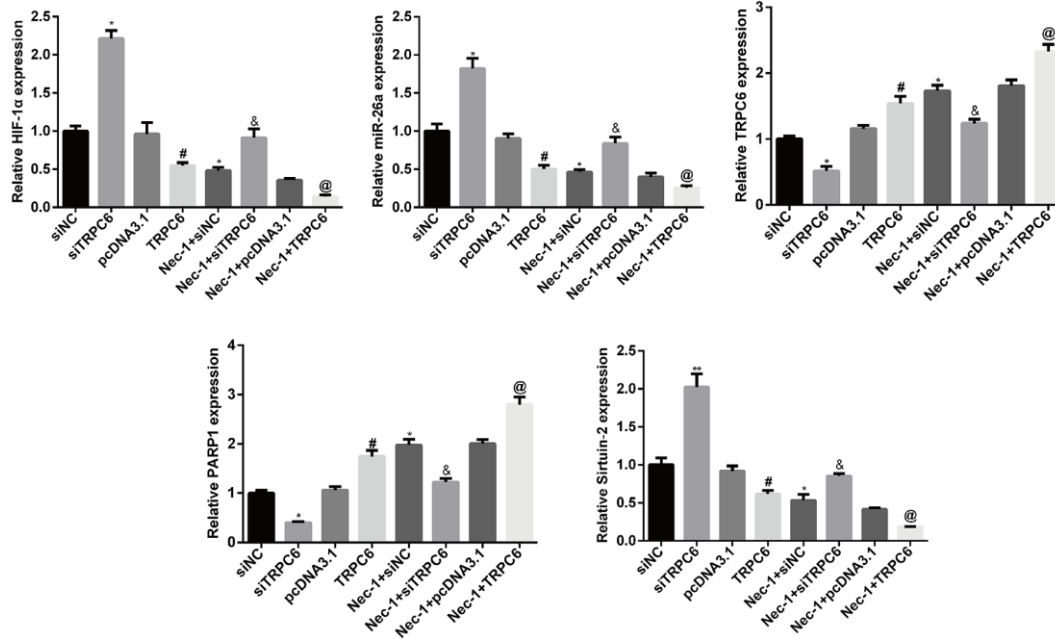

**Figure 3S. Effects of TRPC6 overexpression or knockdown on the levels of HIF-1 $\alpha$ , miR-26a, TRPC6, necroptosis, oxidative stress and inflammation-related molecules in HK-2 cells under conditions of H/R injury with or without Nec-1 treatment.** Quantitative real-time PCR was used to determine the relative levels of miR-26a, HIF-1 $\alpha$ , TRPC6, PARP1, and Sirtuin-2 in HK-2 cells. \* $p < 0.05$  vs. the siNC group; # $p < 0.05$ , vs. the pcDNA3.1 group; & $p < 0.05$  vs. the Nec-1 + siTRPC6; @ $p < 0.05$  vs. the Nec-1 + pcDNA3.1 group.

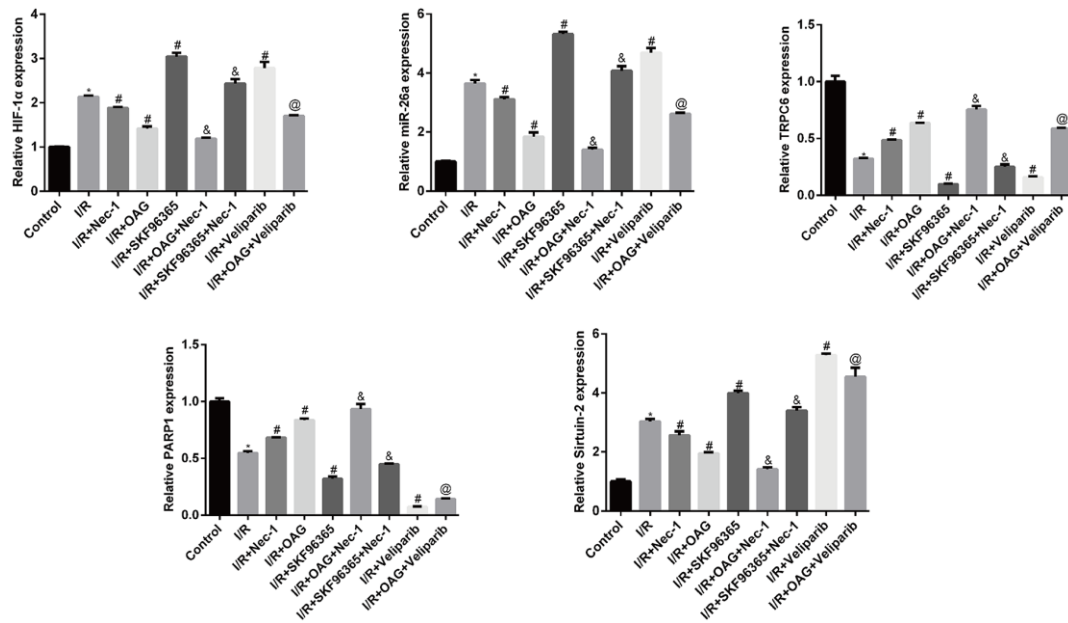

**Figure 4S. Nec-1 pretreatment protected rat kidney tissue against I/R-induced oxidative stress and inflammation via the HIF-1 $\alpha$ /miR-26a/TRPC6 pathway.** Rats in the I/R group were divided into five sub-groups according whether OAG (Sigma, USA), SKF96365 (Sigma, USA) or veliparib (Selleck) was administered before the I/R procedure at 6 h. Similarly, rats in the I/R + Nec-1 group were also divided into three sub-groups. Quantitative real-time PCR was used to determine the relative levels of miR-26a, HIF-1 $\alpha$ , TRPC6, PARP1, and Sirtuin-2 in renal tissues. \* $p < 0.05$  vs. the control group; # $p < 0.05$  vs. the I/R group; & $p < 0.05$  vs. the I/R + Nec-1; @ $p < 0.05$  vs. the I/R + OAG group.

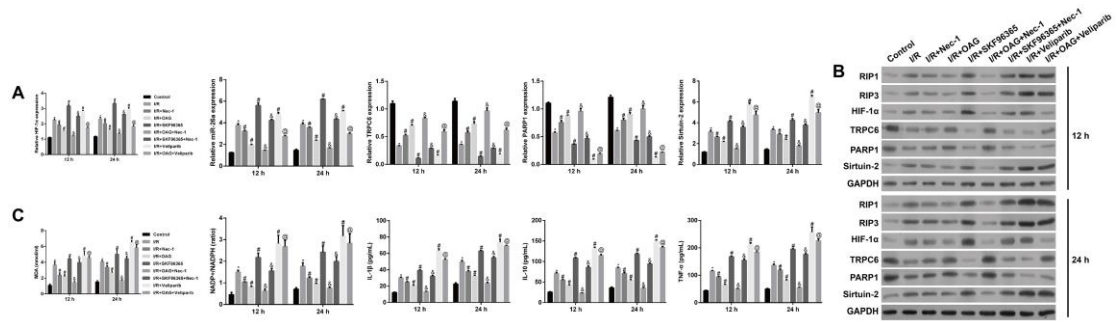

**Figure 5S. Nec-1 pretreatment protected rat kidney tissue against I/R-induced oxidative stress and inflammation via the HIF-1 $\alpha$ /miR-26a/TRPC6 pathway.** Rats in I/R group were divided into five sub-groups according whether OAG (Sigma, USA), SKF96365 (Sigma, USA) or veliparib (Selleck) was administered at before the I/R procedure at 12 and 24 h. Similarly, rats in I/R + Nec-1 group were also divided into three sub-groups. (A) Quantitative real-time PCR was used to determine the relative levels of miR-26a, HIF-1 $\alpha$ , TRPC6, PARP1, and Sirtuin-2 in renal tissues. (B) Western blotting was performed to detect HIF-1 $\alpha$ , RIP1, RIP3, TRPC6, PARP1, and Sirtuin-2 expression in renal tissues. (C) A MDA detection kit and NADP<sup>+</sup>/NADPH assay kit were used to measure the MDA level and NADP<sup>+</sup>/NADPH ratio, respectively. Specific ELISA kits were used to detect the levels of inflammatory cytokines, IL-1 $\beta$ , IL-10, and TNF- $\alpha$ . \* $p$  < 0.05 vs. the control group; # $p$  < 0.05 vs. the I/R group; & $p$  < 0.05 vs. the I/R + Nec-1; @ $p$  < 0.05 vs. the I/R + OAG group.
